# Supplementary material
Source: PubMed Central journal article supplement (PMC2919935)
Supplement: 1004594107_pnas.201004594SI.pdf [file 1004594107_pnas.201004594SI.pdf]

# Supporting Information

Honigberg et al. 10.1073/pnas.1004594107

## SI Materials and Methods

**Kinase Assays.** In vitro kinase  $IC_{50}$ s were measured using  $^{33}P$  filtration binding assay after 1 h incubation of kinase,  $^{33}P$ -ATP, inhibitor, and substrate [0.2 mg/mL poly(EY)(4:1)]. Assays were performed at Reaction Biology (Malvern, PA).

**PK.** Female CD-1 mice were administered a single 3.31- or 14.2-mg/kg dose of formulated PCI-32765 by oral gavage. Dose volumes were adjusted based on body weight data collected immediately before dosing. Blood samples were collected at 0.0833 (5 min), 0.333 (20 min), 1, 2, 4, 8, and 24 h after dosing and processed to plasma. Plasma samples prepared as 75- $\mu$ L aliquots were mixed with 10  $\mu$ L of an internal standard solution (1  $\mu$ g/mL). The internal standard was PCI-31431, a Btk inhibitor with structural similarity to PCI-32765. Soluble proteins were precipitated by the addition of 200  $\mu$ L of acetonitrile, followed by centrifugation (20 min at 16,000  $\times$  g). The samples were evaporated to dryness and reconstituted in 200  $\mu$ L of water containing 0.2% formic acid and 10%

methanol. All samples were loaded onto an autosampler maintained at approximately 6  $^{\circ}C$  and evaluated for concentrations of test compound by LC-MS/MS as follows. Reverse-phase HPLC was performed under gradient conditions using water containing 0.2% formic acid and acetonitrile as mobile phases at a flow rate of 0.7 mL/min. A Phenomenex C-18 guard column and a Varian Metasil 3- $\mu$ m HPLC column were used. Both PCI-32765 and the internal standard had a retention time of 6.80 min. Analytes were ionized for MS using an electrospray ion source (API-3200 mass spectrometer) and quantified by multiple-reaction monitoring using an  $m/z$  transition of 441.0  $\rightarrow$  138.1. The quantifiable range of PCI-32765 concentrations in mouse plasma was 1 to 1,000 ng/mL. Pharmacokinetic parameters were calculated from plasma concentrations of PCI-32765 using WinNonlin 5.01 (Pharsight). The analyses were performed using nominal sample times and a non-compartmental method with uniform weighting. The  $AUC_{0-\infty}$  for mice administered the lower dose of PCI-32765 was extrapolated from  $AUC_{0-8h}$ .

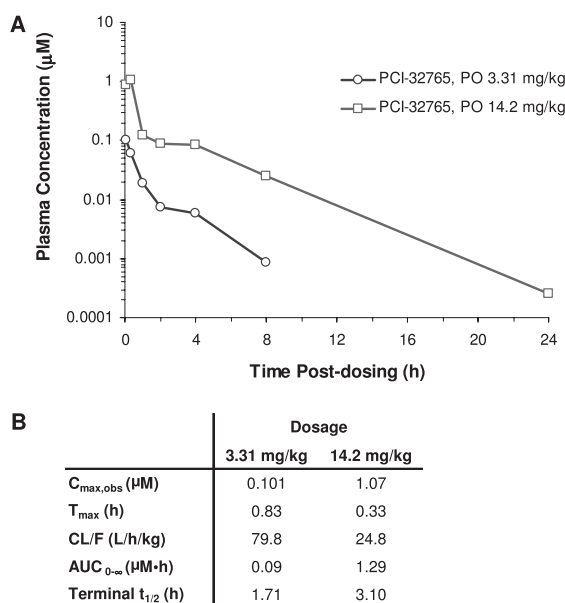

**Fig. S1.** Pharmacokinetics of PCI-32765 in mice. (A) Mean plasma concentrations following a single oral dose of PCI-32765 in female CD-1 mice,  $n = 3-5$  per time point. (B) Summary of pharmacokinetic parameters calculated from data shown in A.

**Table S1. IC<sub>50</sub> values and fold selectivity for inhibition of enzymatic activity by PCI-32765**

| Kinase         | IC <sub>50</sub> , nM | Btk selectivity, fold |
|----------------|-----------------------|-----------------------|
| BTK            | 0.5                   | —                     |
| BLK*           | 0.5                   | 1                     |
| BMX*           | 0.8                   | 1.6                   |
| CSK            | 2.3                   | 4.6                   |
| FGR            | 2.3                   | 4.6                   |
| BRK            | 3.3                   | 6.6                   |
| HCK            | 3.7                   | 7.4                   |
| EGFR*          | 5.6                   | 11.2                  |
| YES            | 6.5                   | 13                    |
| ErbB2*         | 9.4                   | 18.8                  |
| ITK*           | 10.7                  | 21.4                  |
| JAK3*          | 16.1                  | 32.2                  |
| FRK            | 29.2                  | 58.4                  |
| LCK            | 33.2                  | 66.4                  |
| RET            | 36.5                  | 73                    |
| FLT3           | 73                    | 146                   |
| TEC*           | 78                    | 156                   |
| ABL            | 86                    | 172                   |
| FYN            | 96                    | 192                   |
| RIPK2          | 152                   | 304                   |
| c-SRC          | 171                   | 342                   |
| LYN            | 200                   | 400                   |
| PDGFR $\alpha$ | 718                   | 1436                  |
| FMS            | 5545                  | >10,000               |
| FER            | 8070                  | >10,000               |
| JAK1           | >10,000               | >10,000               |
| JAK2           | >10,000               | >10,000               |
| NEK2           | >10,000               | >10,000               |
| p38            | >10,000               | >10,000               |
| PI3K           | >10,000               | >10,000               |
| PLK1           | >10,000               | >10,000               |
| RSK1           | >10,000               | >10,000               |
| SYK            | >10,000               | >10,000               |

\*Kinases that contain a cysteine residue aligning with Cys-481 in Btk.
